# Supplementary material for: DNA polymerase preference determines PCR priming efficiency
Source: PubMed Central journal article supplement (PMC3937175; doi:10.1186/1472-6750-14-10), 2014-01-30
Supplement: 1472-6750-14-10-S1.pdf [file 1472-6750-14-10-S1.pdf]

| Barcode Number | Barcode Sequence | Total Number of Reads | Average Number of Reads Per Unique Sequence in a Given Observation Window (4bp, 6bp, 8bp, 10bp) |       |      |       | Barcode and DNA Polymerase Description                              |
|----------------|------------------|-----------------------|-------------------------------------------------------------------------------------------------|-------|------|-------|---------------------------------------------------------------------|
|                |                  |                       | 4 bp                                                                                            | 6 bp  | 8 bp | 10 bp |                                                                     |
| 1              | GCAT             | 9,720,533             | 37,971                                                                                          | 2,373 | 148  | 10    | SL: template used for all PCR amplification experiments             |
| 2              | CCAA             | 11,462,176            | 44,774                                                                                          | 2,798 | 175  | 11    | Amplified background: Primer placed 4 bp outside of the 12 N region |
| 3              | GATC             | 4,925,811             | 19,241                                                                                          | 1,203 | 75   | 5     | PGT-A pol 6N amplification product                                  |
| 4              | GCTT             | 5,154,225             | 20,134                                                                                          | 1,258 | 79   | 5     | PGT-A pol 6N amplification product: repeat                          |
| 5              | GGCC             | 4,786,732             | 18,698                                                                                          | 1,169 | 73   | 5     | QTT-A pol 6N amplification product                                  |
| 6              | ATCG             | 5,904,773             | 23,066                                                                                          | 1,442 | 90   | 6     | QTT-A pol 6N amplification product: repeat                          |
| 7              | CGGT             | 9,165,718             | 35,804                                                                                          | 2,238 | 140  | 9     | QHH-B pol 6N amplification product                                  |
| 8              | GTCA             | 5,704,314             | 22,282                                                                                          | 1,393 | 87   | 6     | QTT-A pol 6N product (63 °C Annealing)                              |
| 9              | TTGG             | 5,014,614             | 19,588                                                                                          | 1,224 | 77   | 5     | QTT-A pol 6N product (65 °C Annealing)                              |
| 10             | CCGG             | 5,480,506             | 21,408                                                                                          | 1,338 | 84   | 5     | QTT-A pol 6N product (67 °C Annealing)                              |

### Pan et al, Additional file 1 – Table S1

Barcodes and read coverage are presented. The barcode sequence, the number of total associated reads, the average number of reads per unique sequence in the 4 bp, 6 bp, 8 bp, and 10 bp windows, and the DNA polymerase used are provided for each of the pooled amplification experiments. During pooling, more of the SL and amplified background were included in the pool (as evidenced by the read distribution) to ensure that both of these libraries had an ample number of reads for downstream analysis.
