# Supplementary material for: DNA polymerase preference determines PCR priming efficiency
Source: PubMed Central journal article supplement (PMC3937175; doi:10.1186/1472-6750-14-10), 2014-01-30
Supplement: 1472-6750-14-10-S2.pdf [file 1472-6750-14-10-S2.pdf]

| <b>4 bp “runway” relative read bias against SL</b>      | <b>Pearson R</b> | <b>R<sup>2</sup></b> | <b>p =</b> | <b>N =</b> |
|---------------------------------------------------------|------------------|----------------------|------------|------------|
| <b>Amplified Background</b>                             | 0.994            | 0.988                | 0.000000   | 256        |
| <b>Promega GoTaq</b>                                    | 0.484            | 0.234                | 0.000000   | 256        |
| <b>Qiagen TopTaq</b>                                    | 0.462            | 0.213                | 0.000000   | 256        |
| <b>Qiagen HotStar HiFidelity</b>                        | 0.680            | 0.462                | 0.000000   | 256        |
| <b>6 bp relative read bias against SL</b>               |                  |                      |            |            |
| <b>Amplified Background</b>                             | 0.971            | 0.943                | 0.000000   | 4,096      |
| <b>Promega GoTaq</b>                                    | 0.161            | 0.026                | 0.000000   | 4,096      |
| <b>Qiagen TopTaq</b>                                    | 0.167            | 0.028                | 0.000000   | 4,096      |
| <b>Qiagen HotStar HiFidelity</b>                        | -0.220           | 0.048                | 0.000000   | 4,096      |
| <b>8 bp relative read bias Against SL</b>               |                  |                      |            |            |
| <b>Amplified Background</b>                             | 0.904            | 0.817                | 0.000000   | 65,536     |
| <b>Promega GoTaq</b>                                    | 0.165            | 0.027                | 0.000000   | 65,536     |
| <b>Qiagen TopTaq</b>                                    | 0.159            | 0.025                | 0.000000   | 65,536     |
| <b>Qiagen HotStar HiFidelity</b>                        | -0.102           | 0.010                | 0.000000   | 65,536     |
| <b>Promega GoTaq vs. Qiagen TopTaq Bias</b>             |                  |                      |            |            |
| <b>4 bp “runway”</b>                                    | 0.986            | 0.972                | 0.000000   | 256        |
| <b>6 bp</b>                                             | 0.994            | 0.988                | 0.000000   | 4,096      |
| <b>8 bp</b>                                             | 0.974            | 0.949                | 0.000000   | 65,536     |
| <b>Promega GoTaq vs. Qiagen HotStar HiFidelity Bias</b> |                  |                      |            |            |
| <b>4 bp “runway”</b>                                    | 0.697            | 0.486                | 0.000000   | 256        |
| <b>6 bp</b>                                             | 0.390            | 0.152                | 0.000000   | 4,096      |
| <b>8 bp</b>                                             | 0.402            | 0.162                | 0.000000   | 65,536     |
| <b>OBV vs. PPI</b>                                      |                  |                      |            |            |
| <b>6 bp Promega GoTaq</b>                               | 0.980            | 0.960                | 0.000000   | 4,096      |
| <b>6 bp Qiagen TopTaq</b>                               | 0.980            | 0.960                | 0.000000   | 4,096      |
| <b>6 bp Qiagen HotStar HiFidelity</b>                   | 0.992            | 0.984                | 0.000000   | 4,096      |
| <b>8 bp Promega GoTaq</b>                               | 0.965            | 0.931                | 0.000000   | 65,536     |
| <b>8 bp Qiagen TopTaq</b>                               | 0.965            | 0.931                | 0.000000   | 65,536     |
| <b>8 bp Qiagen HotStar HiFidelity</b>                   | 0.969            | 0.939                | 0.000000   | 65,536     |

## Pan et al, Additional file 2 – Table S2

Statistical analysis of compared data sets. A statistical comparison of several data sets is provided with Pearson R, R<sup>2</sup>, p-value, and n.
