# Supplementary material for: DNA polymerase preference determines PCR priming efficiency
Source: PubMed Central journal article supplement (PMC3937175; doi:10.1186/1472-6750-14-10), 2014-01-30
Supplement: 1472-6750-14-10-S3.pdf [file 1472-6750-14-10-S3.pdf]

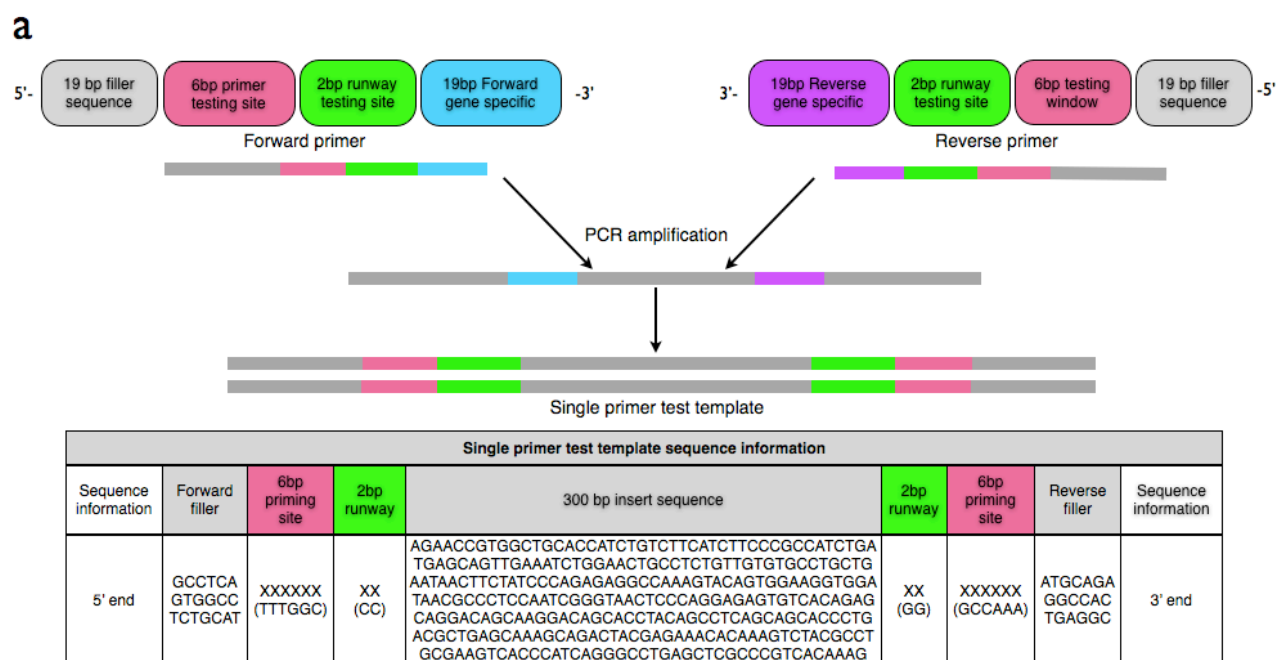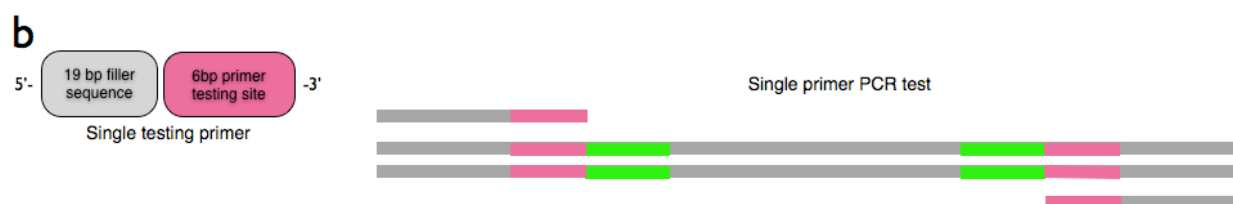

### Pan et al, Additional file 3 – Figure S1

Design for generating single-primer templates and their amplification. (a) The forward primer consists of a filler sequence, an 8 bp primer testing window and 18 nucleotides specific for a portion of the sense strand of the human IgG C-kappa domain. The reverse primer includes the same filler and 8 bp priming testing site, but includes 18 bp specific for the antisense strand of the kappa domain. After amplification, both the sense and antisense strand contain the same 8 bp sequence for single-primer testing. (b) After the templates are generated, gel purified, and the concentration normalized over all samples, a single primer, which serves as both forward and reverse, consisting of 19 bp of the filler region and 6 bp of the 8 bp priming site, is used in the amplification experiment.
