# Supplementary material for: DNA polymerase preference determines PCR priming efficiency
Source: PubMed Central journal article supplement (PMC3937175; doi:10.1186/1472-6750-14-10), 2014-01-30
Supplement: 1472-6750-14-10-S6.pdf [file 1472-6750-14-10-S6.pdf]

| NO. | GC (%) | 6bp Sequence | 6bp OBV | 6bp Sequence (Reverse) | 6bp OBV |
|-----|--------|--------------|---------|------------------------|---------|
| 1   | 50     | CCG TTT      | 0.48    | TTT CCG                | 4.55    |
| 2   | 50     | GCC TTT      | 0.51    | TTT GCC                | 3.15    |
| 3   | 83.3   | CCG CAG      | 0.52    | CAG CCG                | 3.16    |
| 4   | 66.7   | CCG GAT      | 0.54    | GAT CCG                | 3.37    |
| 5   | 66.7   | CCG AGT      | 0.56    | AGT CCG                | 3.09    |
| 6   | 50     | CCG TTA      | 0.57    | TTA CCG                | 3.22    |
| 7   | 50     | CGC TTT      | 0.58    | TTT CGC                | 3.76    |
| 8   | 66.7   | CCG ATG      | 0.62    | ATG CCG                | 3.92    |
| 9   | 33.3   | TGC TTT      | 0.66    | TTT TGC                | 3.19    |
| 10  | 83.3   | CCG AGG      | 0.67    | AGG CCG                | 3.99    |
| 11  | 83.3   | CCG GAG      | 0.67    | GAG CCG                | 4.24    |
| 12  | 66.7   | CCG TCT      | 0.67    | TCT CCG                | 3.45    |
| 13  | 66.7   | CCG TAG      | 0.69    | TAG CCG                | 4.00    |
| 14  | 66.7   | CCG GTT      | 0.70    | GTT CCG                | 4.63    |
| 15  | 66.7   | GCC TTC      | 0.70    | TTC GCC                | 3.22    |
| 16  | 50     | GGC TTT      | 0.72    | TTT GGC                | 5.76    |
| 17  | 50     | GCG TTT      | 0.77    | TTT GCG                | 3.48    |
| 18  | 66.7   | CCG TTG      | 0.78    | TTG CCG                | 7.56    |
| 19  | 66.7   | CCG TGA      | 0.80    | TGA CCG                | 3.90    |
| 20  | 66.7   | CCG TTC      | 0.81    | TTC CCG                | 5.59    |
| 21  | 66.7   | CCG GTA      | 0.82    | GTA CCG                | 3.19    |
| 22  | 66.7   | CGC TAG      | 0.84    | TAG CGC                | 3.26    |
| 23  | 66.7   | GGC CTT      | 0.85    | CTT GGC                | 3.30    |
| 24  | 66.7   | GCC TGT      | 0.87    | TGT GCC                | 4.14    |
| 25  | 66.7   | CCG TAC      | 0.91    | TAC CCG                | 3.70    |
| 26  | 66.7   | CCG TGT      | 0.91    | TGT CCG                | 6.06    |
| 27  | 83.3   | CGC AGG      | 0.92    | AGG CGC                | 3.75    |
| 28  | 83.3   | CCG CTC      | 0.92    | CTC CCG                | 3.37    |
| 29  | 83.3   | CCC TGG      | 0.93    | TGG CCC                | 3.58    |
| 30  | 66.7   | GGC TCT      | 0.93    | TCT GGC                | 3.73    |

### **Pan et al, Additional file 6 – Table S3**

The importance of the 3' end of the primer sequence on amplification bias. A detailed demonstration of sequences that have the same GC content but very different amplification outcomes when amplified with QTT-A DNA polymerase.
